# Supplementary material
Source: PubMed Central journal article supplement (PMC7722145)
Supplement: NIHMS1630044-supplement-sup_FigS3.pdf [file NIHMS1630044-supplement-sup_FigS3.pdf]

**Supplemental Figure 3**

| <b>Control</b> | <b>Primordial</b> | <b>Primary</b> | <b>Secondary</b> | <b>Antrum</b> |
|----------------|-------------------|----------------|------------------|---------------|
| Sample 1       | 2440.48           | 341.67         | 839.52           | 165.95        |
| Sample 2       | 1797.69           | 315.74         | 305.56           | 101.85        |
| Sample 3       | 1421.58           | 223.95         | 204.47           | 68.16         |
| Sample 4       | 1376.43           | 346.55         | 224.52           | 146.43        |
| Sample 5       | 2890.00           | 480.00         | 610.00           | 150.00        |

| <b>Melatonin</b> | <b>Primordial</b> | <b>Primary</b> | <b>Secondary</b> | <b>Antrum</b> |
|------------------|-------------------|----------------|------------------|---------------|
| Sample 1         | 735.00            | 273.18         | 132.30           | 112.70        |
| Sample 2         | 671.96            | 283.93         | 327.86           | 72.86         |
| Sample 3         | 670.91            | 326.14         | 149.09           | 18.64         |

| <b>Cisplatin</b> | <b>Primordial</b> | <b>Primary</b> | <b>Secondary</b> | <b>Antrum</b> |
|------------------|-------------------|----------------|------------------|---------------|
| Sample 1         | 442.31            | 144.23         | 153.85           | 57.69         |
| Sample 2         | 612.50            | 186.67         | 151.67           | 11.67         |
| Sample 3         | 527.97            | 169.53         | 145.31           | 29.06         |
| Sample 4         | 556.82            | 204.55         | 261.36           | 68.18         |
| Sample 5         | 1145.21           | 407.29         | 306.67           | 19.17         |

| <b>Mel+ Cisplatin</b> | <b>Primordial</b> | <b>Primary</b> | <b>Secondary</b> | <b>Antrum</b> |
|-----------------------|-------------------|----------------|------------------|---------------|
| Sample 1              | 336.79            | 164.29         | 115.00           | 16.43         |
| Sample 2              | 271.25            | 148.75         | 140.00           | 17.50         |
| Sample 3              | 214.29            | 98.21          | 71.43            | 53.57         |
| Sample 4              | 162.50            | 56.88          | 48.75            | 16.25         |
| Sample 5              | 332.50            | 157.50         | 105.00           | 35.00         |
| Sample 6              | 178.57            | 107.14         | 178.57           | 89.29         |
| Sample 7              | 419.64            | 125.00         | 160.71           | 107.14        |
| Sample 8              | 242.19            | 184.06         | 77.50            | 77.50         |
| Sample 9              | 262.50            | 175.00         | 87.50            | 52.50         |
