# Supplementary material
Source: PubMed Central journal article supplement (PMC7722145)

Supplemental Figure 1

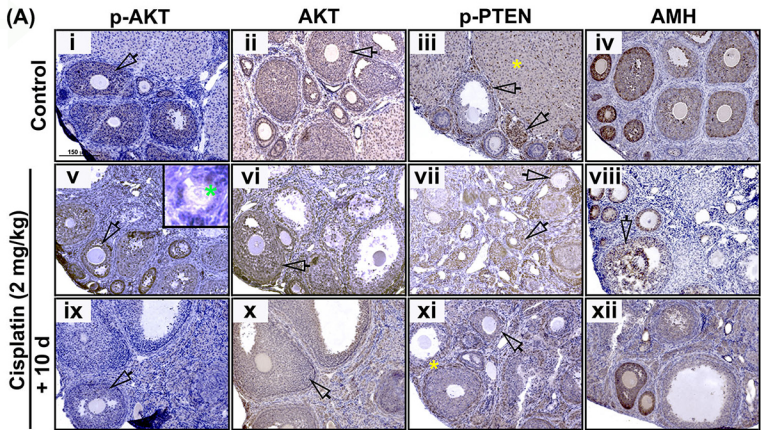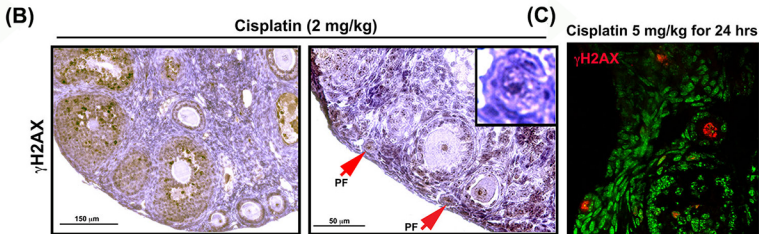

Supplement: NIHMS1630044-supplement-sup_FigS1.pdf [file NIHMS1630044-supplement-sup_FigS1.pdf]

# Supplemental Figure 2

(A)

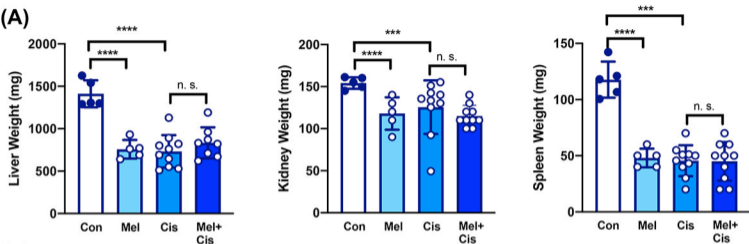

(B)

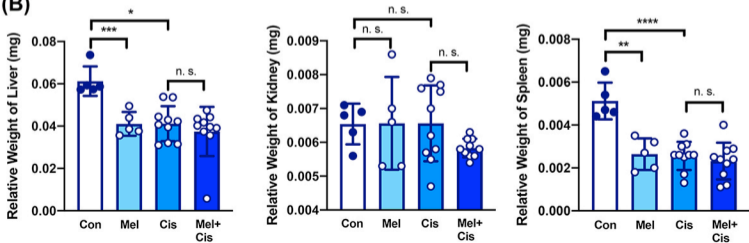

Supplement: NIHMS1630044-supplement-sup_FigS2.pdf [file NIHMS1630044-supplement-sup_FigS2.pdf]
